# Supplementary material for: Repressed Ang 1–7 in COVID-19 Is Inversely Associated with Inflammation and Coagulation
Source: PubMed Central journal article supplement (PMC9429950; doi:10.1128/msphere.00220-22), 2022-08-01
Supplement: msphere.00220-22-s0001.pdf [file msphere.00220-22-s0001.pdf]

**Supplemental Table I | COVID-19 Patient Demographics and Clinical Characteristics by Outcome**

| Characteristic                                 | No. (%)                  |                                |                      |                    |
|------------------------------------------------|--------------------------|--------------------------------|----------------------|--------------------|
|                                                | Hospitalized<br>(n= 142) | Required<br>Oxygen<br>(n= 118) | Ventilated<br>(n=61) | Deceased<br>(n=25) |
| <b>Demographics</b>                            |                          |                                |                      |                    |
| Age (mean, SD)                                 | 59.34 (16.72)            | 59.49 (16.04)                  | 58.33 (14.27)        | 69.48 (15.74)      |
| Sex                                            |                          |                                |                      |                    |
| Female                                         | 64 (45.1)                | 53 (44.9)                      | 24 (39.3)            | 10 (40.0)          |
| Male                                           | 78 (54.9)                | 65 (55.1)                      | 37 (60.7)            | 15 (60.0)          |
| Race                                           |                          |                                |                      |                    |
| African American                               | 32 (22.5)                | 28 (23.7)                      | 11 (18.0)            | 5 (20.0)           |
| Asian                                          | 3 (2.1)                  | 3 (2.5)                        | 2 (3.3)              | 0 (0.0)            |
| Other                                          | 51 (35.9)                | 42 (35.6)                      | 26 (42.6)            | 6 (24.0)           |
| White or Caucasian                             | 56 (39.4)                | 45 (38.1)                      | 22 (36.1)            | 14 (56.0)          |
| Ethnicity                                      |                          |                                |                      |                    |
| Hispanic                                       | 57 (40.1)                | 45 (38.1)                      | 27 (44.3)            | 8 (32.0)           |
| <b>Comorbidities</b>                           |                          |                                |                      |                    |
| Cardiac dysfunction                            | 27 (19.0)                | 21 (17.8)                      | 8 (13.1)             | 8 (32.0)           |
| Chronic Kidney Disease                         | 28 (19.7)                | 22 (18.6)                      | 6 (9.8)              | 8 (32.0)           |
| Lung Disease                                   | 26 (18.3)                | 20 (16.9)                      | 7 (11.5)             | 5 (20.0)           |
| Liver Disease                                  | 3 (2.1)                  | 2 (1.7)                        | 0 (0.0)              | 0 (0.0)            |
| Stroke                                         | 12 (8.5)                 | 11 (9.3)                       | 3 (4.9)              | 5 (20.00)          |
| Immunosuppression                              | 11 (7.7)                 | 9 (7.6)                        | 7 (11.5)             | 2 (8.0)            |
| Cancer                                         | 13 (9.2)                 | 10 (8.5)                       | 6 (9.8)              | 3 (12.0)           |
| Diabetes                                       | 62 (43.7)                | 54 (45.8)                      | 24 (39.3)            | 13 (52.0)          |
| Body Mass Index                                |                          |                                |                      |                    |
| <30 (not obese)                                | 56 (43.1)                | 45 (40.5)                      | 23 (37.7)            | 12 (54.5)          |
| >30 (obese)                                    | 74 (56.9)                | 66 (59.5)                      | 38 (62.3)            | 10 (45.5)          |
| <b>Medications</b>                             |                          |                                |                      |                    |
| ACE inhibitor, prior to admission              | 39 (27.5)                | 35 (29.7)                      | 20 (32.8)            | 8 (32.0)           |
| ARB, prior to admission                        | 14 (9.9)                 | 9 (7.6)                        | 3 (4.9)              | 3 (12.0)           |
| <b>COVID-19 Clinical Indicators/Treatments</b> |                          |                                |                      |                    |
| Received Steroids                              | 72 (50.7)                | 67 (56.8)                      | 41 (62.1)            | 12 (48.0)          |
| Received Remdesivir                            | 38 (27.1)                | 39 (33.3)                      | 17 (27.9)            | 5 (20.8)           |
| D-dimer (Mean, SD)                             | 795.06 (1006.82)         | 776.94 (1030.79)               | 1043.61 (1286.46)    | 897.00 (838.89)    |
| MAP (Day of Sample) (Mean, SD)                 | 88.01 (11.67)            | 87.07 (11.32)                  | 83.59 (10.16)        | 82.96 (11.25)      |
| Days from Symptom Onset to Sample (Mean, SD)   | 11.57 (11.57)            | 11.35 (10.44)                  | 14.83 (13.00)        | 14.50 (14.58)      |
